# Supplementary material
Source: PubMed Central journal article supplement (PMC8511125)
Supplement: NIHMS1739882-supplement-1.pdf [file NIHMS1739882-supplement-1.pdf]

## SUPPLEMENTAL INFORMATION

### Methods for B<sub>1</sub><sup>+</sup> and Slice Profile correction.

Our approach to B<sub>1</sub><sup>+</sup> and slice profile correction was devised to accommodate the large range of B<sub>1</sub><sup>+</sup> variation we observed across the abdomen (0.5 – 1.5, in terms of relative flip angle). B<sub>1</sub><sup>+</sup> values determined by a separate B<sub>1</sub><sup>+</sup> mapping scan were used to select the appropriate dictionary for T<sub>1</sub> and T<sub>2</sub> matching. We implemented slice profile correction by approximating the slice profile for all excitations in the pulse train by a scaled version of the slice profile for the maximum achieved FA (nominal FA multiplied by B<sub>1</sub><sup>+</sup>). This approximation meant that the series of FA experienced by each isochromat (*i*) across the slice were scaled versions of each other, where the scale is determined by isochromat location. Thus, a slice profile and B<sub>1</sub><sup>+</sup> corrected dictionary could be assembled by the weighted sum of individual simulations for each isochromat:

$$I_{corrected}(T_1, T_2, B_1^+) = \sum_{i=1}^N W_{sp}(rFA_i(B_1^+)) \times I(T_1, T_2, rFA_i) , \quad (1)$$

where weights and simulations corresponding to each isochromat are  $W_{sp}(rFA_i(B_1^+))$  and  $I(T_1, T_2, rFA_i)$ , respectively. We generated a dictionary using an extended phase graph simulation for all combinations of T<sub>1</sub>, T<sub>2</sub> and  $rFA_i$  (between 0.02 and 1.5, in 0.02 increments). To be clear, the simplifying approximation described above meant that each simulation was for the series of FA where the nominal FA series (Figure 1 A) was multiplied by  $rFA_i$ . We calculated slice profiles ( $M_{xy}$ ) for the maximum achieved flip angle for each B<sub>1</sub><sup>+</sup> value ( $FA_{max} = 78^\circ$  multiplied by B<sub>1</sub><sup>+</sup>) for the implemented excitation pulses (Hanning-windowed sinc, duration = 2 ms, time bandwidth product = 4) in a range four times the nominal slice width and for 1001 isochromats using rftools [59].  $W_{sp}$  were determined by taking the fraction of discrete positions ( $r_i$ ) across each simulated slice profile when  $(abs(M_{xy}(r_i)))/78^\circ$  was between  $(rFA_i + rFA_{i-1})/2$  and  $(rFA_i + rFA_{i+1})/2$ . See Figure 1 B for an example slice profile.

B<sub>1</sub><sup>+</sup> maps were smoothed and interpolated to match the resolution of the MRF acquisition and to mitigate motion corruption of the in vivo B<sub>1</sub><sup>+</sup> maps (Figure 1 C-F). Motion and different k-space acquisition trajectories meant that the B<sub>1</sub><sup>+</sup> maps were not perfectly aligned to the MRF images. Since B<sub>1</sub><sup>+</sup> variations have low spatial frequency, maps were smoothed by fitting with a 6th-order polynomial, and then interpolated to have the same resolution and FOV as the raw MRF images. The relative flip angle estimate for each voxel was used as prior information for dictionary matching.

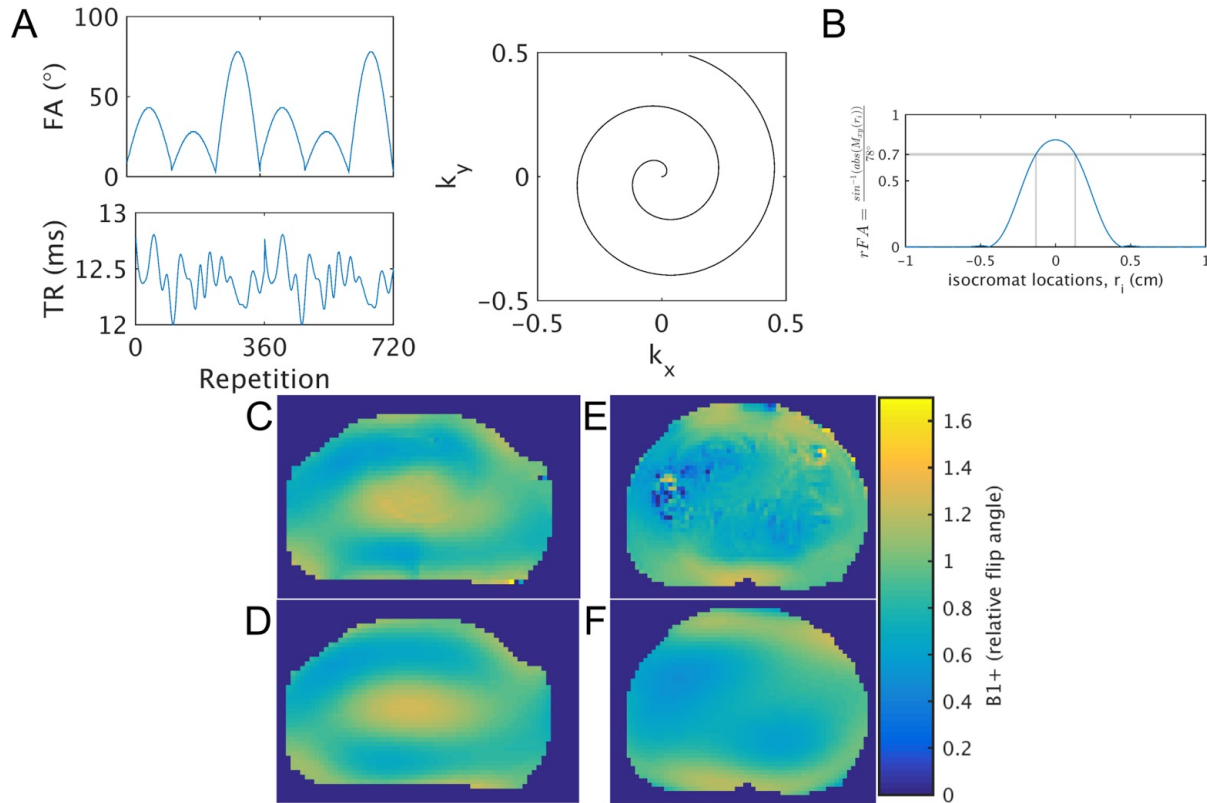

**Figure S1. Methods.** The sinusoid variation in flip angles (FA) and the perlin noise pattern variation in repetition times (TR) used in the sequence and one interleave of the continuous density spiral readout (A). Slice profile for an example region (B) where the  $B_1^+$  inhomogeneity is such that the spins achieve only 80% of the nominal FA for each excitation pulse. Thus the maximum FA in the series is  $0.8 \cdot 78 = 62.4$ . To determine, for example, the weight in Equation 1 ( $W_{sp}$ ) for  $I(T_1, T_2, 0.7)$ , the fraction of isochromats with  $0.69 < rFA < 0.71$  (horizontal gray rectangle) is 0.012 (12/1001). Post-processing of the  $B_1^+$  map for use in MRF dictionary matching demonstrated on a phantom modeling a 22-week GA fetus.  $B_1^+$  map is acquired (C), and then smoothed by fitting 6th-order polynomial (D). In vivo  $B_1^+$  maps sometimes have motion artifacts from fetal motion or swirling amniotic fluid (E) that are minimized by smoothing (F).

**Table S1.** Reference and MRF-determined relaxation times for the NIST phantom  $T_1$ - and  $T_2$ -arrays. Values presented as median (interquartile range) of relaxation time across hand-drawn ROIs.

| T1 array     |            |             |            |             |
|--------------|------------|-------------|------------|-------------|
| Array number | T1 GT [ms] | T1 MRF [ms] | T2 GT [ms] | T2 MRF [ms] |
| 1            | 1989       | 2020 (75)   | 1465       | 1550 (200)  |
| 2            | 1454       | 1460 (110)  | 1076       | 1150 (215)  |
| 3            | 984        | 1070 (60)   | 718        | 742 (36)    |
| 4            | 706        | 750 (60)    | 510        | 562 (48)    |
| 5            | 497        | 540 (80)    | 360        | 358 (57)    |
| 6            | 352        | 390 (40)    | 256        | 235 (30)    |
| 7            | 247        | 270 (80)    | 181        | 198 (55)    |
| 8            | 175        | 200 (55)    | 127        | 145 (48)    |
| 9            | 126        | 130 (40)    | 90         | 84 (32)     |
| 10           | 89         | 100 (20)    | 64         | 73 (20)     |
| 11           | 63         | 60 (0)      | 46         | 37 (8)      |
| 12           | 45         | 40 (15)     | 32         | 32 (22)     |
| 13           | 31         | 40 (0)      | 22         | 34 (8)      |
| 14           | 22         | 20 (20)     | 16         | 18 (27)     |
| T2 array     |            |             |            |             |
| Array number | T1 GT [ms] | T1 MRF [ms] | T2 GT [ms] | T2 MRF [ms] |
| 1            | 2480       | 2460 (80)   | 581        | 544 (72)    |
| 2            | 2173       | 2260 (60)   | 404        | 394 (36)    |
| 3            | 1907       | 1960 (105)  | 278        | 275 (34)    |
| 4            | 1604       | 1680 (80)   | 191        | 200 (15)    |
| 5            | 1332       | 1350 (80)   | 133        | 117 (20)    |
| 6            | 1044       | 1100 (120)  | 97         | 80 (22)     |
| 7            | 802        | 840 (130)   | 64         | 65 (21)     |
| 8            | 609        | 630 (100)   | 46         | 47 (16)     |
| 9            | 458        | 480 (60)    | 32         | 27 (12)     |
| 10           | 336        | 340 (60)    | 22         | 22 (10)     |
| 11           | 244        | 260 (45)    | 16         | 16 (8)      |
| 12           | 177        | 180 (20)    | 11         | 14 (8)      |
| 13           | 127        | 160 (20)    | 8          | 10 (1)      |
| 14           | 91         | 120 (20)    | 6          | 10 (5)      |

**Figure S2. Visualization of the effects of slice profile and B1+ corrections individually** on  $T_2$  and  $T_1$  values for the 22-week anthropomorphic phantom. The symbol marks the median parameter value and the error bars show IQR of the voxels within the hand-drawn ROI. The ROIs are represented by color and shown in the inset of Fig 2E: maternal abdomen (blue), placenta (red), fetal body (green), and fetal brain (magenta). The measurement types are represented by symbols: reference or ground truth (x), uncorrected MRF (triangle), B1+ correction only (square), slice-profile correction only (star), and B1+ and slice profile corrected MRF (circle). Note that in the placenta ROI (red) the two corrections individually yield the same median value, but the IQR is narrower for the SPC- $T_1$  (25 ms) and B1+- $T_2$  (30 ms).

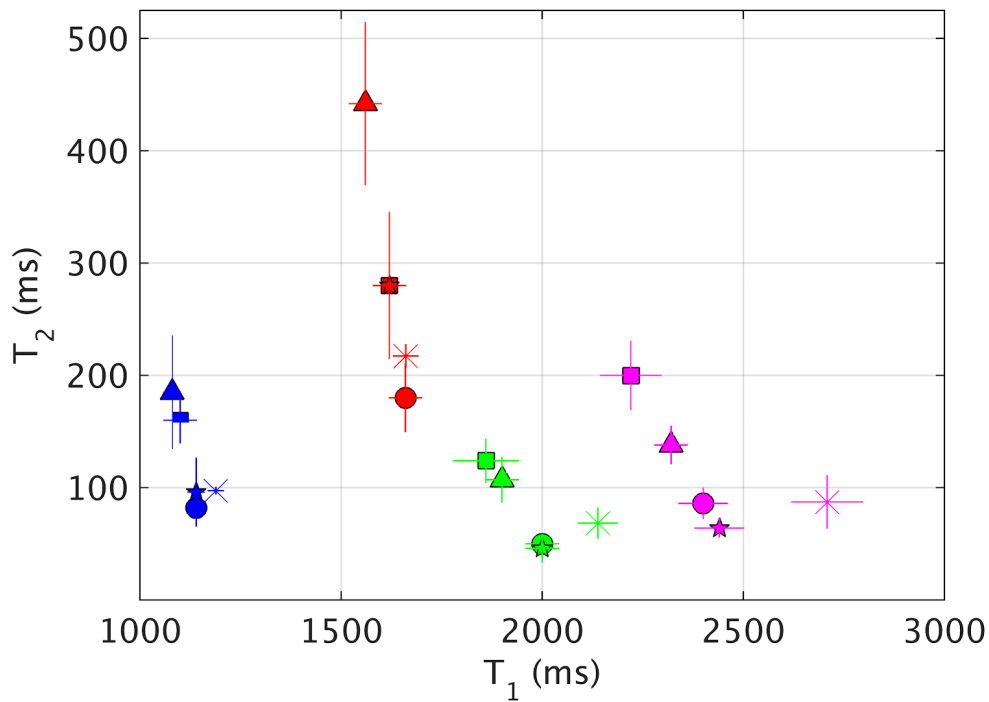

**Figure S3. Motion and no motion.** Example  $T_1$  (A, C) and  $T_2$  (B, D) parameter maps during hyperoxia without motion (A, B) and with motion (C, D) for GA 35w2d. Motion causes a depression in  $T_2$  estimates (arrows) and a blurring in  $T_1$  most clearly seen in the fetal brain (oval). Acquisition was in the transverse plane while subject was in the left lateral position.

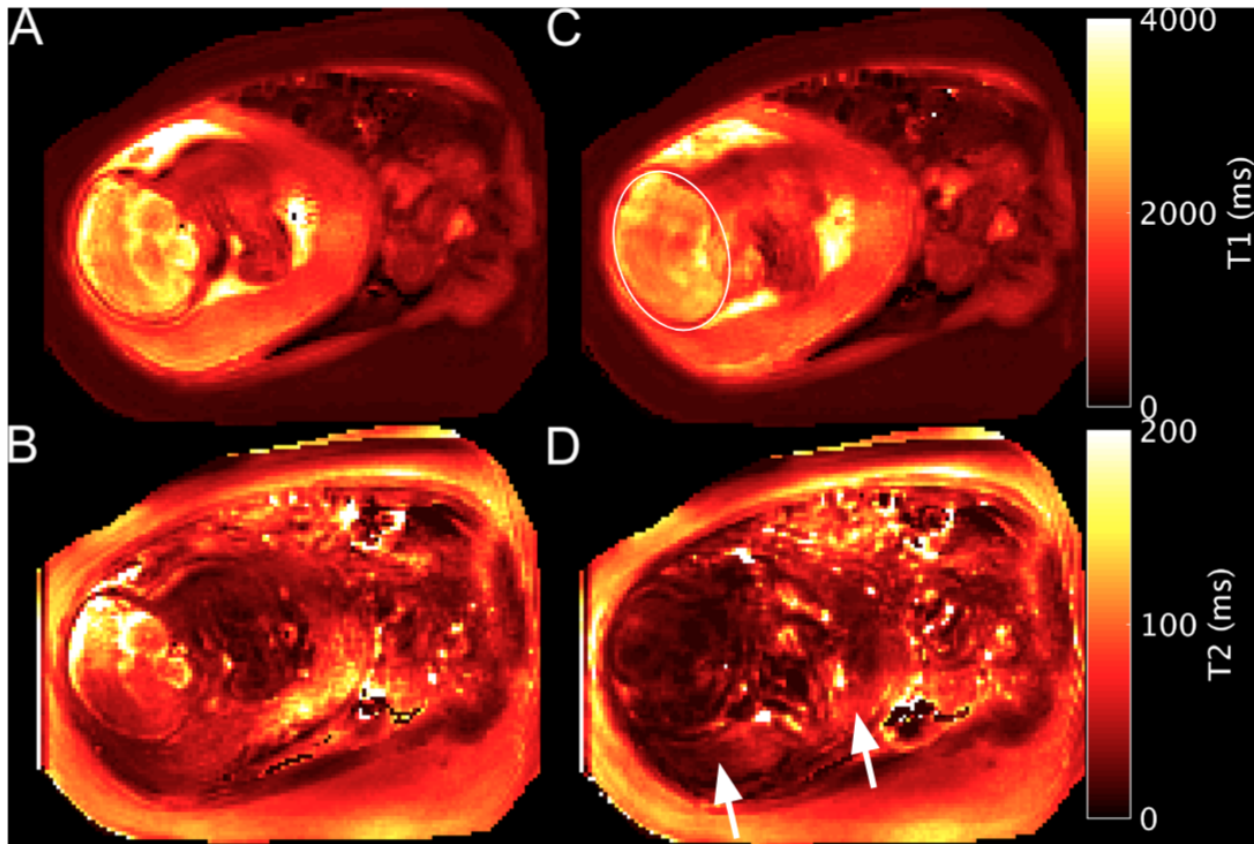

**Table S2. Summary of all MRF measurements.** Each cell is mean(median(ROI)) +/- std(median(ROI)). “--” indicates that there was only one motion-free measurement for this subject. “na” indicates that this region and state was not acquired. “motion” indicates that this measurement was motion corrupted (after subject 10 we collected three MRF acquisitions to mitigate motion corruption).

| Subject number | GA [wk+day] | Placenta ROI        |                     |                     |                     |
|----------------|-------------|---------------------|---------------------|---------------------|---------------------|
|                |             | air                 |                     | O <sub>2</sub>      |                     |
|                |             | T <sub>1</sub> [ms] | T <sub>2</sub> [ms] | T <sub>1</sub> [ms] | T <sub>2</sub> [ms] |
| 1              | 27+1        | 2000 ± 0            | 42 ± 0              | na                  | na                  |
| 2              | 36+5        | 1500 ± 0            | 32 ± 0              | na                  | na                  |
| 3              | 34+4        | 1580 ± 0            | 52 ± 0              | 1800 ± 0            | 52 ± 0              |
| 4              | 34+2        | motion              | motion              | motion              | motion              |
| 5              | 34+0        | motion              | motion              | motion              | motion              |
| 6              | 32+3        | 1700 ± 0            | 50 ± 0              | 1620 ± 0            | 40 ± 0              |
| 7              | 34+3        | 1780 ± 0            | 82 ± 0              | motion              | motion              |
| 8              | 28+5        | 1880 ± --*          | 64 ± --             | motion              | motion              |
| 9              | 29+2        | motion              | motion              | 1840 ± --           | 60 ± --             |
| 10             | 34+5        | 2000 ± --           | 54 ± --             | 2040 ± --           | 48 ± --             |
| 11             | 35+3        | 1840 ± 80           | 62 ± 7              | 1825 ± 35           | 76 ± 11             |
| 12             | 35+6        | 1780 ± 75           | 60 ± 2              | 1753 ± 12           | 77 ± 4              |
| 13             | 29+6        | 1867 ± 31           | 70 ± 7              | 1810 ± 71           | 78 ± 6              |
| 14             | 34+4        | 1910 ± 12           | 72 ± 2              | 1880 ± 0            | 76 ± 0              |
| 15             | 35+3        | 2020 ± 0            | 34 ± 0              | 1880 ± 0            | 48 ± 0              |
| 16             | 34+6        | 1777 ± 31           | 83 ± 4              | 1807 ± 85           | 69 ± 4              |
| 17             | 27+1        | 1835 ± 21           | 53 ± 1              | motion              | motion              |
| 18             | 32+1        | 1553 ± 12           | 47 ± 5              | 1580 ± --           | 56 ± --             |
| 19             | 34+6        | 1820 ± --           | 48 ± --             | 1840 ± --           | 60 ± --             |
| 20             | 34+0        | 1990 ± 32           | 86 ± 4              | 1987 ± 23           | 87 ± 2              |
| 21             | 30+4        | 1953 ± 27           | 58 ± 5              | 1950 ± 0            | 52 ± 0              |
| 22             | 29+6        | 1760 ± 72           | 72 ± 4              | 1820 ± --           | 62 ± --             |
| 23             | 29+2        | 1900 ± 35           | 71 ± 8              | 1900 ± --           | 64 ± --             |
| 24             | 32+2        | 1680 ± 0            | 54 ± 0              | 1650 ± 42           | 49 ± 1              |
| 25             | 33+5        | 1900 ± 208          | 53 ± 6              | 1970 ± 12           | 54 ± 14             |
| 26             | 25+6        | 1980 ± 57           | 76 ± 0              | na                  | na                  |

|    |      |           |         |            |         |
|----|------|-----------|---------|------------|---------|
| 27 | 24+2 | 1880 ± -- | 94 ± -- | 1680 ± 198 | 79 ± 21 |
| 28 | 29+4 | 1625 ± 52 | 58 ± 5  | 1595 ± 29  | 60 ± 2  |
| 29 | 36+2 | 1820 ± -- | 54 ± -- | na         | na      |
| 30 | 29+4 | 1960 ± 0  | 43 ± 2  | 1970 ± 42  | 48 ± 0  |
| 31 | 31+4 | 1813 ± 10 | 48 ± 2  | 1907 ± 27  | 71 ± 1  |

**Figure S4.** Histograms of voxelwise  $T_1$  and  $T_2$  estimates for the placental ROIs for all subjects with motion-free acquisitions. Color represents GA.

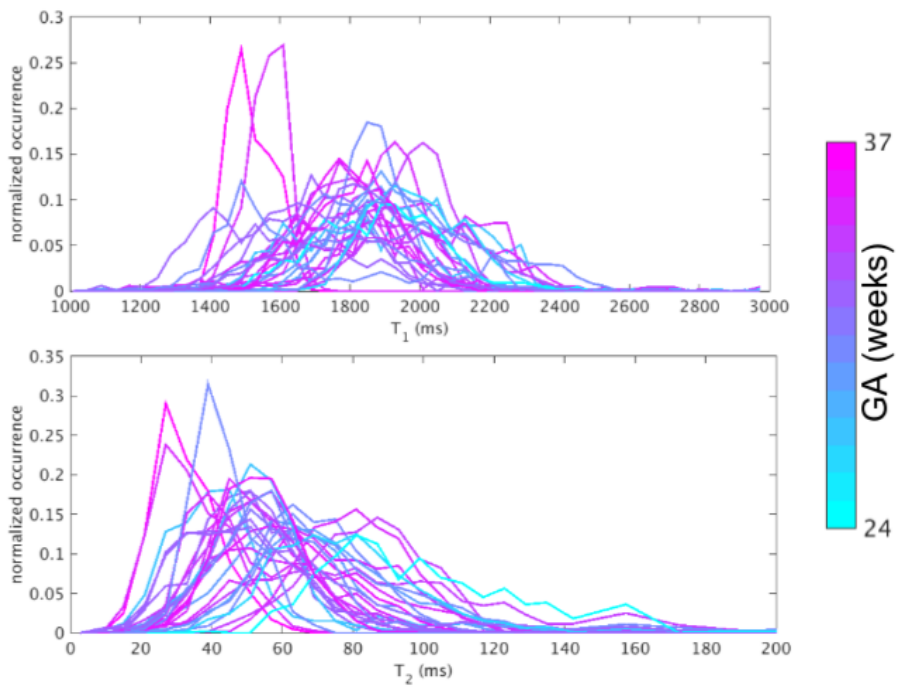

**Table S3.** Mean $\pm$ -standard deviation multiple MRF measurements from different parallel slices. Each measurement was summarized by, as elsewhere, the median of the hand-drawn ROI of the placenta. Significant differences between slice measurements ( $P<0.05$ ) is indicated by \*.

| Placenta      |       | MRF            |            |        |
|---------------|-------|----------------|------------|--------|
| Subject/Slice | slice | T1             | T2         | N_meas |
| 11            | 1     | 1880 $\pm$ 20  | 59 $\pm$ 8 | 3      |
| 11            | 2     | 1780 $\pm$ 113 | 66 $\pm$ 6 | 2      |
| 12            | 1     | 1680 $\pm$ 0*  | 58 $\pm$ 0 | 2      |
| 12            | 2     | 1790 $\pm$ 14* | 61 $\pm$ 1 | 2      |
| 20            | 1     | 1980 $\pm$ 35  | 86 $\pm$ 3 | 3      |
| 20            | 2     | 2020 $\pm$ 0   | 85 $\pm$ 7 | 2      |

**Detection of motion from “fully-sampled” mixed contrast MRF images presented as movies:**

subj11\_still\_MID02903\_slwin30\_meas1to720.avi

subj11\_motion\_MID02904\_slwin30\_meas1to720.avi

Each movie consists of 691 consecutive images reconstructed via the sliding window method (34).
